# Supplementary material for: The c-Met Inhibitor MSC2156119J Effectively Inhibits Tumor Growth in Liver Cancer Models
Source: MDPI journal article supplement (doi:10.3390/cancers6031736), 2014-08-19
Supplement: s1 [file s1]

## Supplementary Information

**Table S1.** Pathology diagnosis of the patient-derived HCC models used in this study.

| Model Name | Pathology Diagnosis (Provided by CrownBio)                                                                                                                                                                                                                                  | Other                            |
|------------|-----------------------------------------------------------------------------------------------------------------------------------------------------------------------------------------------------------------------------------------------------------------------------|----------------------------------|
| LIMsh050   | Hepatocellular carcinoma from middle lobe of liver, grade IV, G4-S4, cancer emboli were observed in part of vessels, nodular cirrhosis presented in surrounding liver tissues, fatty degeneration (about 10%–15%) was observed.                                             | HBV(–);<br>HCV(–)                |
| LIM334     | Nodular cirrhosis with hepatocellular carcinoma, chronic cholecystitis.                                                                                                                                                                                                     | HBV(+++);<br>HCV(–)              |
| LIM348     | Postnecrotic cirrhosis with combined cell type carcinoma; postnecrotic cirrhosis with mixed carcinoma of liver.                                                                                                                                                             | Cachexia;<br>HBV(–);<br>HCV(–)   |
| LIM574     | Hepatocellular carcinoma.                                                                                                                                                                                                                                                   | HBV(±);<br>HCV(–)                |
| LIM612     | Postnecrotic cirrhosis with hepatocellular carcinoma.<br>Chronic cholecystitis.                                                                                                                                                                                             | Cachexia,<br>HBV(+++);<br>HCV(–) |
| LIM752     | Hepatocellular carcinoma of right lobe of liver with massive necrosis, massive type, tumor mass: 14 cm × 12 cm × 10 cm. Chronic cholecystitis, cholelithiasis. IHC result: CK(++) CK7(–) CK18(++) CK19(++) CEA(–) AFP(–) Hepatocyte(–) Actin(–) Actin(SM)(–) CD34(+) F8(+). | HBV(–);<br>HCV(–)                |
| LIM801     | Early hepatocirrhosis with hepatocarcinoma. Chronic cholecystitis. Cholelithiasis.                                                                                                                                                                                          | HBV(++);<br>HCV(–)               |
| LIM941     | Hepatocirrhosis with hepatocarcinoma. Malignant cells invaded gall bladder wall.                                                                                                                                                                                            | Cachexia;<br>HBV(±);<br>HCV(–)   |
| LIM1081    | Hepatocellular carcinoma, diffuse in liver, cancer embolus in vessel. IHC results: AFP(<5% +), HEPA(100% +++), CD34(massive vessel), CK19(–), PDEC(10% +), P53(20% ++ – +++), EGFR(–), HER2(<5% +), KI-67(about 15% ++).                                                    | HBV(+++);<br>HCV(–)              |
| LIM1098    | Hepatocellular carcinoma of right lobe, grade II, peripheral hepatic tissue G1S1.                                                                                                                                                                                           | Cachexia,<br>HBV(–);<br>HCV(–)   |
| MHCC97H    | Highly metastatic clone from parental HCC cell line LCI-D20, LCI-D20 model established from a highly metastatic patient-derived hepatocellular carcinoma.                                                                                                                   | [1]                              |

**Table S2.** AFP plasma levels in xenograft models at the start and at end of treatment.

| Liver Cancer Model | AFP Plasma Concentration (ng/mL) |                  |             |                           |                  |             |                           |                  |             |
|--------------------|----------------------------------|------------------|-------------|---------------------------|------------------|-------------|---------------------------|------------------|-------------|
|                    | Vehicle                          |                  |             | Sorafenib                 |                  |             | MSC2156119J               |                  |             |
|                    | Before Start of Treatment        | End of Treatment | Fold Change | Before Start of Treatment | End of Treatment | Fold Change | Before Start of Treatment | End of Treatment | Fold Change |
| LIM801             | 33                               | 134              | 4.1         | 18                        | 23               | 1.3         | 19                        | 35               | 1.8         |
| LIM574             | 7671                             | 25638            | 3.3         | 5817                      | 9017             | 1.6         | 5929                      | 14922            | 2.5         |
| LIM752             | 925                              | 15995            | 17.3        | 1012                      | 1629             | 1.6         | 847                       | 16210            | 19.1        |
| LIMsh050           | 4025                             | 11944            | 3.0         | 4321                      | 30815            | 7.1         | 4984                      | 33916            | 6.8         |
| MHCC97H            | 1                                | 136              | 136         | NA                        | NA               | NA          | 24                        | 6                | 0.25        |

No detectable AFP levels in model LIM334, LIM1081, LIM348, LIM1098. LIM941 and LIM612—subcutaneous tumor model; MHCC97H orthotopic tumor model.

**Figure S1.** Body weight change over time in response to MSC2156119J, sorafenib monotherapy, and combination treatment in three representative human explant xenograft models. Model LIM612 is a cachexia inducing model as seen by the body weight loss in vehicle group. Sorafenib treatment resulted in a similar body weight loss as observed in the vehicle group despite inhibiting tumor growth.

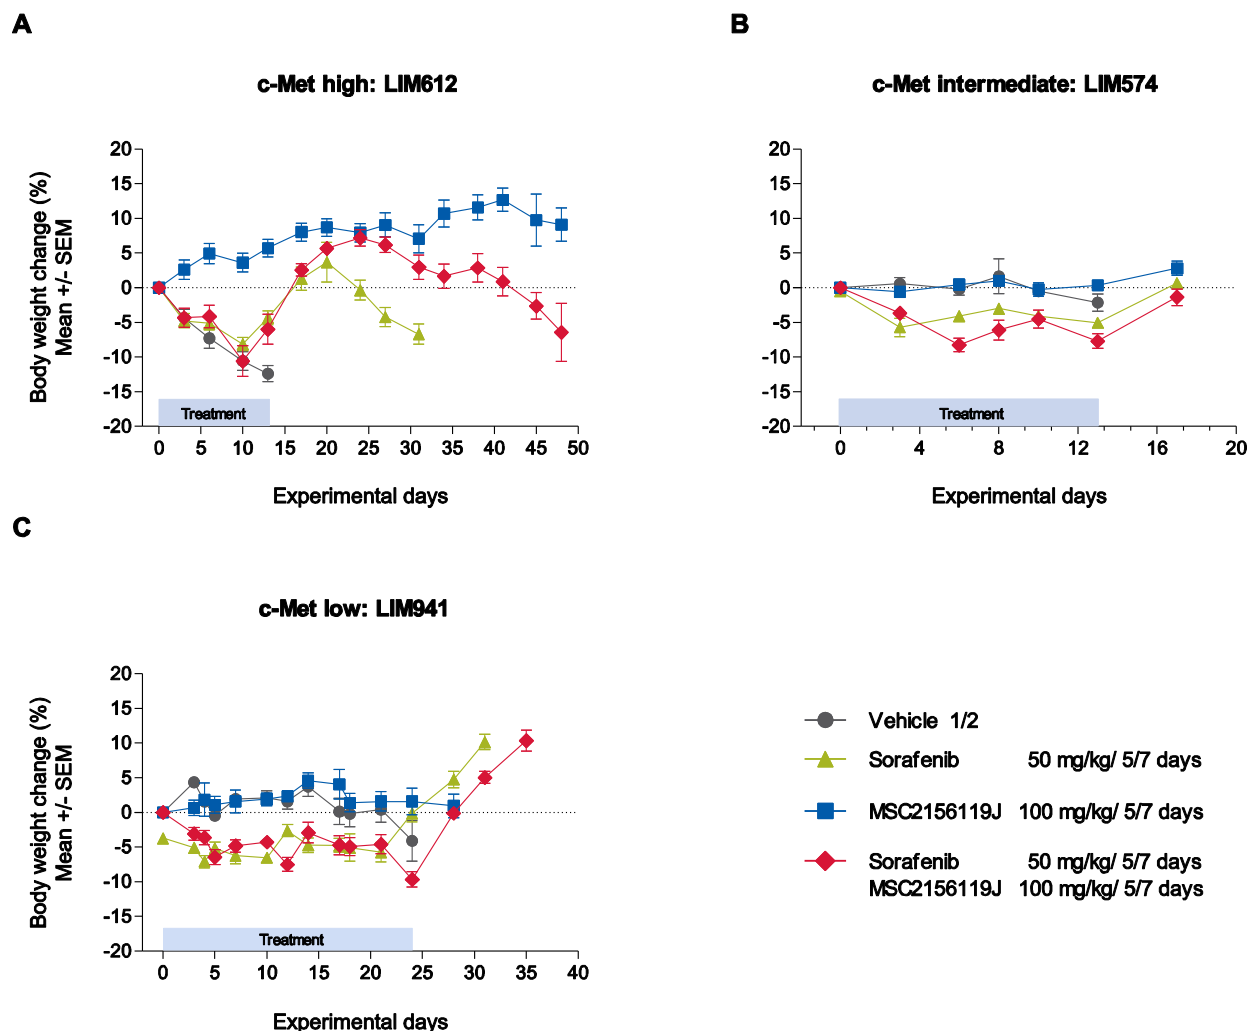

## References

1. Sun, F.X.; Tang, Z.Y.; Lui, K.D.; Ye, S.L.; Xue, Q.; Gao, D.M.; Ma, Z.C. Establishment of a metastatic model of human hepatocellular carcinoma in nude mice via orthotopic implantation of histologically intact tissues. *Int. J. Cancer* **1996**, *66*, 239–243.
